# Supplementary material
Source: PubMed Central journal article supplement (PMC3059120)
Supplement: NIHMS248861-supplement-1_si_001.pdf [file NIHMS248861-supplement-1_si_001.pdf]

## Supporting Information

# Soft Wall Ion Channel in Continuum Representation with Application to Modeling Ion Currents in $\alpha$ - Hemolysin

*Nikolay A. Simakov and Maria G. Kurnikova\**

Department of Chemistry, Carnegie Mellon University, Pittsburgh, Pennsylvania 15213

\* Corresponding author. e-mail: M.G.K.: [kurnikova@cmu.edu](mailto:kurnikova@cmu.edu)

**Table S1.** Parameter set for soft repulsion between protein atoms and mobile ions calculated from all-atom MD simulations (SR-MD).

|                   | K <sup>+</sup> |       | Cl <sup>-</sup> |       |         | K <sup>+</sup> |       | Cl <sup>-</sup> |       |          | K <sup>+</sup> |       | Cl <sup>-</sup> |       |
|-------------------|----------------|-------|-----------------|-------|---------|----------------|-------|-----------------|-------|----------|----------------|-------|-----------------|-------|
|                   | A, Å           | η     | A, Å            | η     |         | A, Å           | η     | A, Å            | η     |          | A, Å           | η     | A, Å            | η     |
| Standard Backbone |                |       |                 |       | MET     |                |       |                 |       | ASN      |                |       |                 |       |
| N                 | 4.33           | 7.77  | 3.18            | 33.21 | CB      | 4.42           | 7.38  | 3.88            | 22.14 | CG       | 3.20           | 14.63 | 3.90            | 18.11 |
| C                 | 3.45           | 24.17 | 4.12            | 17.75 | CG      | 4.06           | 12.57 | 3.80            | 20.40 | CB       | 4.47           | 6.91  | 3.70            | 11.85 |
| O                 | 2.51           | 36.48 | 4.49            | 8.53  | SD      | 3.01           | 21.49 | 4.20            | 14.37 | OD1      | 2.50           | 36.25 | 3.94            | 15.79 |
| CA                | 4.41           | 6.93  | 3.65            | 23.55 | CE      | 4.01           | 7.69  | 3.84            | 12.61 | ND2      | 3.47           | 9.01  | 3.20            | 18.46 |
| ACE               |                |       |                 |       | SER     |                |       |                 |       | GLN      |                |       |                 |       |
| CH3               | 3.81           | 11.31 | 3.72            | 18.18 | CB      | 3.40           | 18.57 | 3.69            | 21.49 | CB       | 4.47           | 6.91  | 3.70            | 11.85 |
| NME               |                |       |                 |       | OG      | 2.53           | 43.46 | 3.05            | 33.36 | CG       | 4.20           | 6.71  | 3.80            | 12.20 |
| CH3               | 3.81           | 11.31 | 3.72            | 18.18 | THR     |                |       |                 |       | CD       | 3.20           | 14.63 | 3.90            | 18.11 |
| N-TERM            |                |       |                 |       | CB      | 3.46           | 15.91 | 3.76            | 23.33 | OE1      | 2.50           | 36.25 | 3.94            | 15.79 |
| N                 | 3.96           | 17.31 | 3.1             | 24.74 | OG1     | 2.51           | 49.72 | 3.04            | 49.14 | NE2      | 3.47           | 9.01  | 3.20            | 18.46 |
| CA                | 4.86           | 5.93  | 3.6             | 13.63 | CG2     | 3.55           | 13.32 | 3.77            | 17.56 | PRO      |                |       |                 |       |
| C                 | 3.45           | 24.17 | 3.7             | 15.44 | PHE     |                |       |                 |       | CB       | 4.37           | 7.53  | 3.63            | 35.22 |
| O                 | 2.51           | 36.48 | 3.5             | 13.21 | CG,CZ   | 3.18           | 19.40 | 4.17            | 14.87 | CG       | 3.94           | 10.38 | 3.92            | 20.33 |
| C-TERM            |                |       |                 |       | CD*,CE* | 3.18           | 19.40 | 4.17            | 14.87 | CD       | 4.60           | 6.46  | 4.01            | 13.41 |
| N                 | 3.60           | 9.90  | 4.70            | 7.03  | TYR     |                |       |                 |       | GLU      |                |       |                 |       |
| CA                | 3.44           | 9.60  | 4.45            | 15.63 | CB      | 4.40           | 7.28  | 3.79            | 20.53 | N        | 3.60           | 9.90  | 4.70            | 7.03  |
| C                 | 3.10           | 16.23 | 4.45            | 15.63 | CG      | 4.54           | 4.85  | 4.76            | 8.58  | CA,CB,CG | 3.44           | 9.60  | 4.45            | 15.63 |
| O                 | 2.58           | 18.78 | 4.22            | 25.13 | CD*     | 3.82           | 25.91 | 3.82            | 25.91 | CD       | 3.10           | 16.23 | 4.45            | 15.63 |
| OXT               | 2.58           | 18.78 | 4.22            | 25.13 | CE*     | 3.30           | 20.60 | 3.76            | 21.13 | OE*      | 2.58           | 18.78 | 4.22            | 25.13 |
| GLY               |                |       |                 |       | CZ      | 3.05           | 27.06 | 3.84            | 25.56 | ASP      |                |       |                 |       |
| ALA               |                |       |                 |       | OH      | 2.53           | 43.22 | 2.99            | 36.38 | N        | 3.60           | 9.90  | 4.70            | 7.03  |
| CB                | 3.83           | 10.69 | 3.77            | 19.19 | TRP     |                |       |                 |       | CA       | 3.44           | 9.60  | 4.45            | 15.63 |
| VAL               |                |       |                 |       | CB      | 4.57           | 5.87  | 3.76            | 22.55 | CB       | 3.44           | 9.60  | 4.45            | 15.63 |
| CA                | 4.41           | 6.93  | 3.65            | 23.55 | CG      | 3.42           | 23.07 | 4.45            | 14.09 | CG       | 3.10           | 16.23 | 4.45            | 15.63 |
| CB                | 4.47           | 9.99  | 4.12            | 13.67 | CD1     | 3.06           | 17.60 | 3.83            | 19.97 | OD*      | 2.58           | 18.78 | 4.22            | 25.13 |
| CG*               | 3.83           | 10.69 | 3.77            | 19.19 | CD2     | 3.24           | 29.62 | 4.76            | 9.62  | ARG      |                |       |                 |       |
| LEU               |                |       |                 |       | NE1     | 2.82           | 28.13 | 3.04            | 49.04 | O        | 2.51           | 36.48 | 4.10            | 8.89  |
| CB                | 5.00           | 6.44  | 4.10            | 10.03 | CE2     | 3.05           | 43.57 | 3.88            | 31.54 | CA       | 4.00           | 15.29 | 3.65            | 23.55 |
| CG                | 5.00           | 6.44  | 4.80            | 6.13  | CE3     | 3.83           | 8.57  | 3.92            | 20.15 | CB,CG,CD | 4.81           | 6.43  | 3.60            | 18.61 |
| CD*               | 3.83           | 10.69 | 3.77            | 19.19 | CZ2     | 3.71           | 8.85  | 3.95            | 12.96 | NE       | 4.00           | 9.75  | 3.10            | 23.99 |
| ILE               |                |       |                 |       | CZ3     | 3.91           | 8.11  | 3.83            | 19.46 | CZ       | 4.70           | 6.46  | 3.55            | 23.94 |
| CB                | 5.00           | 6.44  | 4.10            | 10.03 | CH2     | 3.92           | 7.99  | 3.94            | 12.89 | NH*      | 4.00           | 9.75  | 3.10            | 23.99 |
| CG1               | 5.00           | 3.58  | 4.80            | 3.81  | HIS     |                |       |                 |       | LYS      |                |       |                 |       |
| CG2,CD1           | 3.83           | 10.69 | 3.77            | 19.19 | CB      | 4.11           | 7.49  | 3.99            | 14.22 | CB,CD,CE | 4.86           | 5.93  | 3.60            | 13.63 |
| CYS               |                |       |                 |       | CG      | 5.00           | 3.74  | 4.11            | 22.50 | CG       | 4.86           | 5.93  | 3.70            | 14.04 |
| CA                | 4.41           | 6.93  | 3.78            | 13.84 | ND1     | 4.66           | 4.27  | 3.20            | 17.22 | NZ       | 3.96           | 17.31 | 3.10            | 24.74 |
| CB                | 4.23           | 9.07  | 3.78            | 13.84 | CD2     | 3.56           | 16.57 | 3.55            | 22.41 |          |                |       |                 |       |
| SG                | 3.10           | 16.80 | 3.75            | 17.90 | CE1     | 3.24           | 15.63 | 3.74            | 18.67 |          |                |       |                 |       |
|                   |                |       |                 |       | NE2     | 2.64           | 26.45 | 4.05            | 13.42 |          |                |       |                 |       |

**Table S2.** Average and standard deviation of current upon channel rotations and different grid scales.

The current was calculated with applied potential of 80 mV.

| Current calculation method | Current, pA         |            |
|----------------------------|---------------------|------------|
|                            | Grid scale, grids/Å |            |
|                            | 1.0                 | 2.0        |
| PNP-HR                     | 18.97±0.26          | 20.31±0.04 |
| PNP-SR-MD                  | 21.40±0.20          | 22.53±0.07 |
| PNP-SR-LJ                  | 22.13±0.15          | 22.86±0.09 |

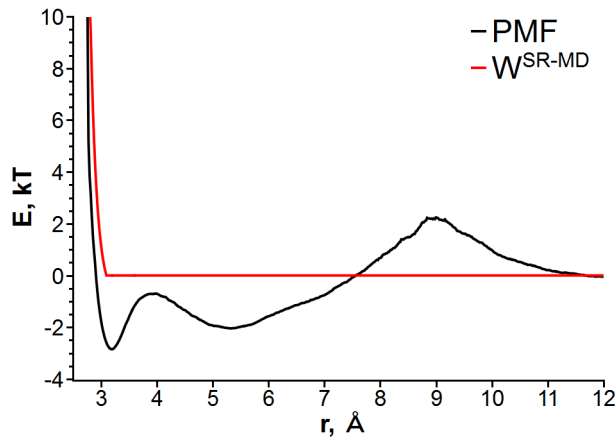

**Figure S1.** Comparison of repulsive part of PMF ( $W^{\text{SR-MD}}$ ) calculated using SR-MD with complete PMF calculated from all atom MD simulation between  $N_{\zeta}$  atom of Lys and  $\text{Cl}^-$ . Note that  $W^{\text{SR-MD}}$  is slightly above of complete PMF because it is decouple from electrostatic attraction.

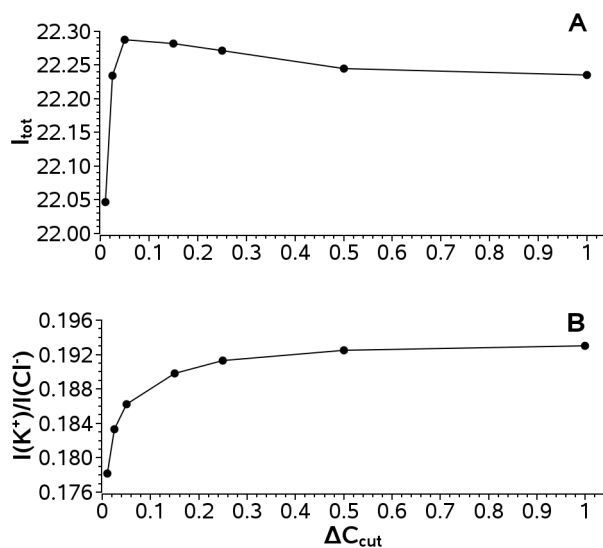

**Figure S2.** Dependency of total current (A) and selectivity of the channel as ratio of  $\text{K}^+/\text{Cl}^-$  currents (B) on the choice of  $\Delta C_{\text{cut}}$  during IAV determination procedure.

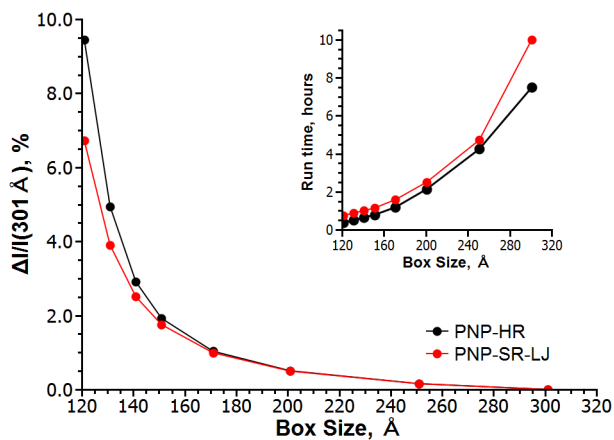

**Figure S3.** Dependency of calculated current and calculation run time (inset) on the size of simulation box; box size corresponds to each side of simulation box. Calculation was done using two CPU's core on desktop with Intel Pentium D 830 CPU.

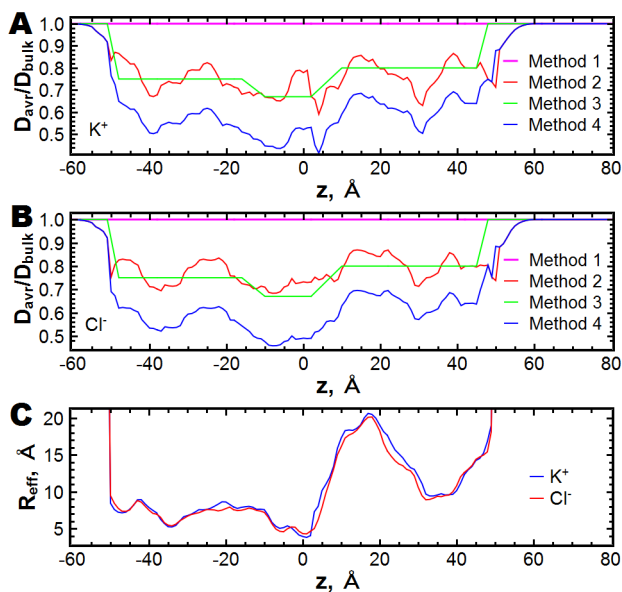

**Figure S4.** Average diffusion coefficient and effective pore radius along z-axis for PNP-SR-MD calculations. (A) and (B) – diffusion coefficients for  $\text{K}^+$  and  $\text{Cl}^-$  respectively, the diffusion coefficients are averaged over the pore's cross section perpendicular to z-axis. (C) Effective pore radius for  $\text{K}^+$  and  $\text{Cl}^-$ ; effective radius is calculated as square root of cross section accessible by ions over  $\pi$ .
